# Supplementary material
Source: PubMed Central journal article supplement (PMC4136266)
Supplement: JVI.01428-14_zjv999099366so1.pdf [file JVI.01428-14_zjv999099366so1.pdf]

## Supplementary Figure 1

| Silenced genes | Cell line  | Oligonucleotide sequence                                            |
|----------------|------------|---------------------------------------------------------------------|
| DGAT1          | shRNA-1666 | CCGGC <u>GACTACTACGTGCTCAACTACT</u> CGAGTAGTTGAGCACGTAGTAGTCGTTTTTG |
|                | shRNA-1183 | CCGGC <u>ATGGACTACTCACGCATCAT</u> CTCGAGATGATGCGTGAGTAGTCCATGTTTTTG |
|                | shRNA-1402 | CCGGC <u>CAGACACTTCTACAAGCCCAT</u> CTCGAGATGGGCTTGTAAGTGCTGTTTTTG   |
| DGAT2          | shRNA-1622 | CCGGG <u>TTCTAGGTGGTGGCTAAATC</u> CTCGAGATTTAGCCACCACCTAGAACTTTTTTG |

Sequences of three different shRNA-DGAT1 and shRNA-DGAT2 oligonucleotides.

Underlined parts are the sequences recognized by respective mRNAs.
